# Supplementary material
Source: Springer Nature journal article supplement (https://www.springermedizin.de/resource/supplementary/13006_2012_153_MOESM1_ESM.pdf/9628128)

**Right breast**

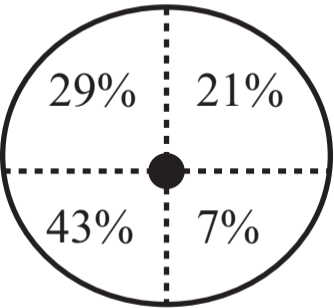

**Sternum**

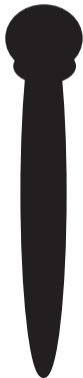

**Left breast**

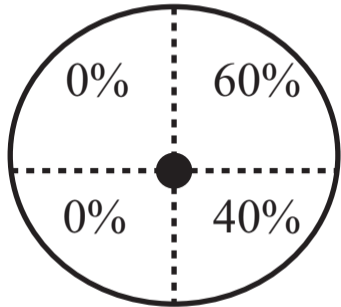

Supplement: MOESM1 [file 9628128]
